# Supplementary material for: SMM features of a large lanthanide family of butterfly CrIII2LnIII2 pivalate complexes (Ln = Gd, Tb, Dy, Ho, Er, Tm and Yb)
Source: Royal Society of Chemistry journal article supplement (doi:10.1039/d4dt01492h), 2024-01-01
Supplement: d4dt01492h1.pdf [file d4dt01492h1.pdf]

## Supplementary Information

### **SMM features of a large lanthanide family of butterfly $\text{Cr}^{\text{III}}_2\text{Ln}^{\text{III}}_2$ pivalate complexes (Ln=Gd, Tb, Dy, Ho, Er, Tm and Yb)**

**Daiana Cabrosi<sup>[a]</sup>, Juan H. Mecchia Ortiz<sup>[a]</sup>, Luca M. Carrella<sup>[b]</sup>, Eva Rentschler<sup>[b]</sup> and Pablo Alborés<sup>[a]\*</sup>**

[a] Departamento de Química Inorgánica, Analítica y Química Física/ INQUIMAE (CONICET),  
Facultad de Ciencias Exactas y Naturales Universidad de Buenos Aires, Pabellón 2, Ciudad  
Universitaria, C1428EHA Buenos Aires, Argentina

Fax: +5411 / 4576-3341

E-mail: albores@qi.fcen.uba.ar

[b] Department Chemie, Johannes Gutenberg Universität Mainz, Duesbergweg 10-12, D-55128 Mainz,  
Germany.

**Table S1.** Crystallographic data of complexes **4-8**.

|                                                              | <b>4</b>                                                                                       | <b>5</b>                                                                                       | <b>6</b>                                                                                       | <b>7</b>                                                                                       | <b>8</b>                                                                                       |
|--------------------------------------------------------------|------------------------------------------------------------------------------------------------|------------------------------------------------------------------------------------------------|------------------------------------------------------------------------------------------------|------------------------------------------------------------------------------------------------|------------------------------------------------------------------------------------------------|
| Empirical Formula                                            | C <sub>44</sub> H <sub>86</sub> Cr <sub>2</sub> Tb <sub>2</sub> N <sub>2</sub> O <sub>20</sub> | C <sub>44</sub> H <sub>86</sub> Cr <sub>2</sub> Ho <sub>2</sub> N <sub>2</sub> O <sub>20</sub> | C <sub>44</sub> H <sub>86</sub> Cr <sub>2</sub> Er <sub>2</sub> N <sub>2</sub> O <sub>20</sub> | C <sub>44</sub> H <sub>86</sub> Cr <sub>2</sub> Tm <sub>2</sub> N <sub>2</sub> O <sub>20</sub> | C <sub>44</sub> H <sub>86</sub> Cr <sub>2</sub> Yb <sub>2</sub> N <sub>2</sub> O <sub>20</sub> |
| Formula weight (g/mol)                                       | 1385                                                                                           | 1397                                                                                           | 1401.66                                                                                        | 1405                                                                                           | 1413.22                                                                                        |
| <i>T</i> (K)                                                 | 298(2)                                                                                         | 298(2)                                                                                         | 298(2)                                                                                         | 298(2)                                                                                         | 298(2)                                                                                         |
| Crystal system                                               | Triclinic                                                                                      | Triclinic                                                                                      | Triclinic                                                                                      | Triclinic                                                                                      | Triclinic                                                                                      |
| Space Group                                                  | <i>P</i> <sub>1</sub>                                                                          |
| <i>a</i> (Å)                                                 | 11.1421(5)                                                                                     | 11.1437(4)                                                                                     | 11.1602(5)                                                                                     | 11.1582(4)                                                                                     | 11.1858(8)                                                                                     |
| <i>b</i> (Å)                                                 | 11.3002(4)                                                                                     | 11.2605(5)                                                                                     | 11.2588(5)                                                                                     | 11.2288(4)                                                                                     | 11.2445(6)                                                                                     |
| <i>c</i> (Å)                                                 | 12.3000(3)                                                                                     | 12.2413(5)                                                                                     | 12.2291(5)                                                                                     | 12.2148(4)                                                                                     | 12.2084(6)                                                                                     |
| $\alpha$ (°)                                                 | 105.975(3)                                                                                     | 106.323(4)                                                                                     | 106.575(4)                                                                                     | 106.728(3)                                                                                     | 106.881(5)                                                                                     |
| $\beta$ (°)                                                  | 90.898(3)                                                                                      | 90.948(3)                                                                                      | 91.167(4)                                                                                      | 91.108(3)                                                                                      | 91.234(5)                                                                                      |
| $\gamma$ (°)                                                 | 94.388(3)                                                                                      | 94.054(3)                                                                                      | 93.723(4)                                                                                      | 93.631(3)                                                                                      | 93.317(5)                                                                                      |
| <i>V</i> (Å <sup>3</sup> )                                   | 1483.41(9)                                                                                     | 1469.43(10)                                                                                    | 1468.44(12)                                                                                    | 1461.59(9)                                                                                     | 1465.74(15)                                                                                    |
| <i>Z</i>                                                     | 1                                                                                              | 1                                                                                              | 1                                                                                              | 1                                                                                              | 1                                                                                              |
| <i>D</i> <sub>calc</sub> (mg/m <sup>3</sup> )                | 1.550                                                                                          | 1.579                                                                                          | 1.585                                                                                          | 1.596                                                                                          | 1.601                                                                                          |
| Absorption coefficient (mm <sup>-1</sup> )                   | 2.778                                                                                          | 3.090                                                                                          | 3.256                                                                                          | 3.434                                                                                          | 3.589                                                                                          |
| <i>F</i> (000)                                               | 702                                                                                            | 706                                                                                            | 708                                                                                            | 710                                                                                            | 712                                                                                            |
| $\lambda$ (Å)                                                | 0.71073                                                                                        | 0.71073                                                                                        | 0.71073                                                                                        | 0.71073                                                                                        | 0.71073                                                                                        |
| $\theta$ Range data collection (°)                           | 3.67- 26.31                                                                                    | 3.84-28.74                                                                                     | 3.86-27.71                                                                                     | 3.79-28.62                                                                                     | 4.01-28.60                                                                                     |
| Index ranges                                                 | -14 ≤ <i>h</i> ≤ 13                                                                            | -14 ≤ <i>h</i> ≤ 14                                                                            | -14 ≤ <i>h</i> ≤ 14                                                                            | -14 ≤ <i>h</i> ≤ 13                                                                            | -14 ≤ <i>h</i> ≤ 13                                                                            |
|                                                              | -14 ≤ <i>k</i> ≤ 14                                                                            |
|                                                              | -15 ≤ <i>l</i> ≤ 15                                                                            | -15 ≤ <i>l</i> ≤ 13                                                                            |
| Reflections collected/unique                                 | 30931/6431                                                                                     | 30724/6382                                                                                     | 11491/6301                                                                                     | 24730/6348                                                                                     | 11631                                                                                          |
| <i>R</i> <sub>int</sub>                                      | 0.0410                                                                                         | 0.0578                                                                                         | 0.0424                                                                                         | 0.0375                                                                                         | 0.0419                                                                                         |
| Observed reflections [ <i>I</i> > 2σ( <i>I</i> )]            | 5773                                                                                           | 5647                                                                                           | 5405                                                                                           | 5798                                                                                           | 5700                                                                                           |
| Completeness (%)                                             | 99.74                                                                                          | 99.73                                                                                          | 99.68                                                                                          | 99.72                                                                                          | 99.70                                                                                          |
| Maximum / minimum transmission                               | 1.000/ 0.640                                                                                   | 1.000/0.856                                                                                    | 1.000/0.934                                                                                    | 1.000/0.541                                                                                    | 1.000/0.687                                                                                    |
| Data/restraints/parameters                                   | 6431/217/328                                                                                   | 6382/205/328                                                                                   | 6301/199/328                                                                                   | 6348/208/328                                                                                   | 6617/205/328                                                                                   |
| Goodness-of-fit (GOF) on <i>F</i> <sup>2</sup>               | 1.077                                                                                          | 1.095                                                                                          | 1.050                                                                                          | 1.074                                                                                          | 1.057                                                                                          |
| Final <i>R</i> -index [ <i>I</i> > 2σ( <i>I</i> )]/ all data | 0.0392/0.0457                                                                                  | 0.0376/0.0452                                                                                  | 0.0399/0.503                                                                                   | 0.0368/0.0416                                                                                  | 0.0413/0.0516                                                                                  |
| <i>wR</i> index [ <i>I</i> > 2σ( <i>I</i> )]/all data        | 0.1055/0.1128                                                                                  | 0.0376/0.0452                                                                                  | 0.0934/0.1029                                                                                  | 0.0975/0.1025                                                                                  | 0.0983/0.1077                                                                                  |

|                                                |                                                                                                            |                                                                                                            |                                                                                                            |                                                                                                            |                                                                                                            |
|------------------------------------------------|------------------------------------------------------------------------------------------------------------|------------------------------------------------------------------------------------------------------------|------------------------------------------------------------------------------------------------------------|------------------------------------------------------------------------------------------------------------|------------------------------------------------------------------------------------------------------------|
| Largest peak and hole ( $e \text{ \AA}^{-3}$ ) | 3.002 and -1.701                                                                                           | 1.171 and -1.294                                                                                           | 1.089 and -1.290                                                                                           | 2.814 and -1.792                                                                                           | 1.215 and -1.583                                                                                           |
| Weights, $w$                                   | $1/[\sigma^2(\text{Fo}^2)+(0.0569\text{P})^2+5.2438\text{P}]$ ;<br>$\text{P}=(\text{Fo}^2+2\text{Fc}^2)/3$ | $1/[\sigma^2(\text{Fo}^2)+(0.0431\text{P})^2+2.6984\text{P}]$ ;<br>$\text{P}=(\text{Fo}^2+2\text{Fc}^2)/3$ | $1/[\sigma^2(\text{Fo}^2)+(0.0381\text{P})^2+2.6038\text{P}]$ ;<br>$\text{P}=(\text{Fo}^2+2\text{Fc}^2)/3$ | $1/[\sigma^2(\text{Fo}^2)+(0.0518\text{P})^2+5.0765\text{P}]$ ;<br>$\text{P}=(\text{Fo}^2+2\text{Fc}^2)/3$ | $1/[\sigma^2(\text{Fo}^2)+(0.0455\text{P})^2+1.7781\text{P}]$ ;<br>$\text{P}=(\text{Fo}^2+2\text{Fc}^2)/3$ |

**Table S2.** Main bond distances ( $\text{\AA}$ ) of complexes **4-8**.

| 4   |      |          | 5   |      |          | 6   |      |          | 7   |      |          | 8   |      |          |
|-----|------|----------|-----|------|----------|-----|------|----------|-----|------|----------|-----|------|----------|
| Tb1 | O2   | 2.275(4) | Ho1 | O2   | 2.249(4) | Er1 | O2   | 2.232(4) | Tm1 | O2   | 2.223(4) | Yb1 | O2   | 2.211(3) |
| Tb1 | O3   | 2.277(3) | Ho1 | O3   | 2.247(3) | Er1 | O3   | 2.239(3) | Tm1 | O3   | 2.222(3) | Yb1 | O3   | 2.213(4) |
| Tb1 | O5   | 2.379(3) | Ho1 | O5   | 2.351(3) | Er1 | O5   | 2.350(3) | Tm1 | O5   | 2.326(3) | Yb1 | O5   | 2.333(3) |
| Tb1 | O7   | 2.389(3) | Ho1 | O7   | 2.362(3) | Er1 | O7   | 2.336(3) | Tm1 | O7   | 2.337(3) | Yb1 | O7   | 2.319(4) |
| Tb1 | O8   | 2.460(4) | Ho1 | O8   | 2.363(3) | Er1 | O8   | 2.425(5) | Tm1 | O8   | 2.341(4) | Yb1 | O8   | 2.410(5) |
| Tb1 | O9   | 2.396(4) | Ho1 | O9   | 2.436(4) | Er1 | O9   | 2.358(5) | Tm1 | O9   | 2.413(4) | Yb1 | O9   | 2.335(5) |
| Tb1 | O10  | 2.504(4) | Ho1 | O10  | 2.481(4) | Er1 | O10  | 2.472(4) | Tm1 | O10  | 2.462(4) | Yb1 | O10  | 2.459(4) |
| Tb1 | O10' | 2.521(3) | Ho1 | O10' | 2.500(3) | Er1 | O10' | 2.487(3) | Tm1 | O10' | 2.481(3) | Yb1 | O10' | 2.474(3) |
| Cr1 | N1   | 2.118(4) | Cr1 | N1   | 2.109(4) | Cr1 | N1   | 2.111(5) | Cr1 | N1   | 2.112(4) | Cr1 | N1   | 2.112(5) |
| Cr1 | O2   | 1.952(3) | Cr1 | O2   | 1.947(3) | Cr1 | O2   | 1.948(3) | Cr1 | O2   | 1.949(3) | Cr1 | O2   | 1.955(4) |
| Cr1 | O3   | 1.960(4) | Cr1 | O3   | 1.957(4) | Cr1 | O3   | 1.955(4) | Cr1 | O3   | 1.951(4) | Cr1 | O3   | 1.945(3) |
| Cr1 | O4   | 1.986(3) | Cr1 | O4   | 1.981(3) | Cr1 | O4   | 1.984(4) | Cr1 | O4   | 1.983(3) | Cr1 | O4   | 1.984(4) |
| Cr1 | O6   | 1.980(4) | Cr1 | O6   | 1.982(4) | Cr1 | O6   | 1.980(3) | Cr1 | O6   | 1.975(4) | Cr1 | O6   | 1.985(4) |
| Cr1 | O10  | 1.967(4) | Cr1 | O10  | 1.968(4) | Cr1 | O10  | 1.963(4) | Cr1 | O10  | 1.964(4) | Cr1 | O10  | 1.961(4) |

**Table S3.** Local Ln(III)  $g$ -tensor, energies and composition arising from *ab-initio* computation of complexes **4-8**.

| <b>{Cr<sub>2</sub>Tb<sub>2</sub>}</b> |       |       |       |               |
|---------------------------------------|-------|-------|-------|---------------|
| $E / \text{cm}^{-1}$                  | $g_x$ | $g_y$ | $g_z$ | Composition   |
| 0                                     | 0     | 0     | 17.42 | 92% $m_j = 6$ |
| 0.4                                   |       |       |       | 7% $m_j = 4$  |
| 130.3                                 | 0     | 0     | 13.34 | 78% $m_j = 5$ |
| 131.8                                 |       |       |       | 19% $m_j = 3$ |
| 247.6                                 | 0     | 0     | 9.50  | 53% $m_j = 4$ |
| 262.6                                 |       |       |       | 31% $m_j = 2$ |
| 330.1                                 |       |       |       |               |
| 402.4                                 | 0     | 0     | 12.27 |               |
| 418.5                                 |       |       |       |               |
| 500.1                                 | 0     | 0     | 16.14 |               |
| 503.5                                 |       |       |       |               |
| 703.0                                 |       |       |       |               |
| 703.9                                 | 0     | 0     | 17.63 |               |

| <b>{Cr<sub>2</sub>Ho<sub>2</sub>}</b> |                      |                      |                      |             |
|---------------------------------------|----------------------|----------------------|----------------------|-------------|
| <i>E</i> / cm <sup>-1</sup>           | <i>g<sub>x</sub></i> | <i>g<sub>y</sub></i> | <i>g<sub>z</sub></i> | Composition |
| 0                                     | 0                    | 0                    | 19.11                | 90% mj= 8   |
| 0.2                                   |                      |                      |                      |             |
| 94.6                                  |                      |                      |                      |             |
| 119.8                                 | 0                    | 0                    | 13.7                 |             |
| 124.7                                 |                      |                      |                      |             |
| 151.5                                 | 0                    | 0                    | 9.24                 |             |
| 154.8                                 |                      |                      |                      |             |
| 197.8                                 | 0                    | 0                    | 7.57                 |             |
| 233.4                                 |                      |                      |                      |             |
| 252.7                                 | 0                    | 0                    | 6.79                 |             |
| 255.4                                 |                      |                      |                      |             |
| 270.5                                 | 0                    | 0                    | 11.11                |             |
| 281.2                                 |                      |                      |                      |             |
| 332.2                                 | 0                    | 0                    | 18.46                |             |
| 332.3                                 |                      |                      |                      |             |
| 390.2                                 | 0                    | 0                    | 18.18                |             |
| 392.1                                 |                      |                      |                      |             |

| <b>{Cr<sub>2</sub>Er<sub>2</sub>}</b> |                      |                      |                      |             |
|---------------------------------------|----------------------|----------------------|----------------------|-------------|
| <i>E</i> / cm <sup>-1</sup>           | <i>g<sub>x</sub></i> | <i>g<sub>y</sub></i> | <i>g<sub>z</sub></i> | Composition |
| 0                                     | 0.12                 | 0.58                 | 16.30                | 69% mj=15/2 |
| 0                                     |                      |                      |                      | 18% mj=11/2 |
| 47.8                                  | 0.25                 | 0.38                 | 16.23                | 69% mj=13/2 |
| 47.8                                  |                      |                      |                      | 15% mj=15/2 |
|                                       |                      |                      |                      | 10% mj=11/2 |
| 95.2                                  | 1.87                 | 2.76                 | 12.11                |             |
| 95.2                                  |                      |                      |                      |             |
| 127.8                                 | 1.98                 | 3.63                 | 11.39                |             |
| 127.8                                 |                      |                      |                      |             |
| 183.1                                 | 1.39                 | 4.87                 | 10.23                |             |
| 183.1                                 |                      |                      |                      |             |
| 232.1                                 | 0.30                 | 3.95                 | 8.72                 |             |
| 232.1                                 |                      |                      |                      |             |
| 269.5                                 | 9.50                 | 7.05                 | 2.48                 |             |
| 269.5                                 |                      |                      |                      |             |
| 380.1                                 | 0.26                 | 0.29                 | 17.17                |             |
| 380.1                                 |                      |                      |                      |             |

| <b>{Cr<sub>2</sub>Tm<sub>2</sub>}</b> |       |       |       |                      |
|---------------------------------------|-------|-------|-------|----------------------|
| $E / \text{cm}^{-1}$                  | $g_x$ | $g_y$ | $g_z$ | Composition          |
| 0                                     | 0     | 0     | 13.82 | 97% mj=6             |
| 0.7                                   |       |       |       |                      |
| 279.9                                 | 0     | 0     | 10.39 | 68% mj=5<br>15% mj=4 |
| 294.1                                 |       |       |       |                      |
| 317.1                                 | 0     | 0     | 8.84  | 40% mj=4<br>45% mj=3 |
| 362.8                                 |       |       |       |                      |
| 402.0                                 |       |       |       |                      |
| 454.7                                 | 0     | 0     | 11.02 |                      |
| 489.7                                 |       |       |       |                      |
| 570.2                                 | 0     | 0     | 11.22 |                      |
| 576.9                                 |       |       |       |                      |
| 676.2                                 | 0     | 0     | 13.89 |                      |
| 676.7                                 |       |       |       |                      |

| <b>{Cr<sub>2</sub>Yb<sub>2</sub>}</b> |       |       |       |                            |
|---------------------------------------|-------|-------|-------|----------------------------|
| $E / \text{cm}^{-1}$                  | $g_x$ | $g_y$ | $g_z$ | Composition                |
| 0                                     | 0.65  | 1.25  | 7.33  | 87% mj=7/2<br>7% mj= 3/2   |
| 0                                     |       |       |       |                            |
| 250.0                                 | 1.0   | 1.02  | 6.40  | 57% mj= 5/2<br>28% mj= 3/2 |
| 250.0                                 |       |       |       |                            |
| 402.5                                 | 1.71  | 2.22  | 4.50  |                            |
| 402.5                                 |       |       |       |                            |
| 628.4                                 | 0.09  | 0.16  | 7.52  |                            |
| 628.4                                 |       |       |       |                            |

**Table S4.** Angles (degrees) between  $g_{Dy,z}$  and  $g_{Ln,z}$

|           | <b>2-Ln angle / degrees</b> |
|-----------|-----------------------------|
| <b>Tb</b> | 25                          |
| <b>Dy</b> | 0                           |
| <b>Ho</b> | 4                           |
| <b>Er</b> | 103                         |
| <b>Tm</b> | 64                          |
| <b>Yb</b> | 92                          |

**Table S5.** *Ab-initio* computed low lying doublets energies, *g*-tensors and tunneling splitting of complexes **4-7**.

| <b>{Cr<sub>2</sub>Tb<sub>2</sub>}</b> |                      |                      |                      |                       |
|---------------------------------------|----------------------|----------------------|----------------------|-----------------------|
| <i>E</i> / cm <sup>-1</sup>           | <i>g<sub>x</sub></i> | <i>g<sub>y</sub></i> | <i>g<sub>z</sub></i> | $\Delta_{\text{tun}}$ |
| 0.000                                 | 0.00                 | 0.00                 | 23.06                | <1e-10                |
| 0.000                                 |                      |                      |                      |                       |
| 15.369                                | 0.00                 | 0.00                 | 26.98                | 1.5e-7                |
| 15.369                                |                      |                      |                      |                       |
| 15.393                                | 0.00                 | 0.00                 | 26.98                | 1.0e-7                |
| 15.393                                |                      |                      |                      |                       |
| 30.106                                | 0.00                 | 0.00                 | 30.87                | 6.9e-5                |
| 30.106                                |                      |                      |                      |                       |
| 30.107                                | 0.00                 | 0.00                 | 30.87                | 5.3e-5                |
| 30.107                                |                      |                      |                      |                       |
| 30.742                                | 0.00                 | 0.00                 | 30.87                | 8.4e-5                |
| 30.742                                |                      |                      |                      |                       |
| 36.774                                | 0.00                 | 0.00                 | 0.00                 | 5.3e-3                |
| 36.780                                |                      |                      |                      |                       |
| 36.948                                | 0.00                 | 0.00                 | 0.00                 | 2.6e-4                |
| 36.948                                |                      |                      |                      |                       |
| 36.984                                | 0.00                 | 0.00                 | 0.00                 | 1.0e-2                |
| 36.984                                |                      |                      |                      |                       |
| 37.174                                | 0.00                 | 0.00                 | 0.00                 | 6.9e-3                |
| 37.181                                |                      |                      |                      |                       |

| <b>{Cr<sub>2</sub>Ho<sub>2</sub>}</b> |                      |                      |                      |                       |
|---------------------------------------|----------------------|----------------------|----------------------|-----------------------|
| <i>E</i> / cm <sup>-1</sup>           | <i>g<sub>x</sub></i> | <i>g<sub>y</sub></i> | <i>g<sub>z</sub></i> | $\Delta_{\text{tun}}$ |
| 0.000                                 | 0.00                 | 0.00                 | 26.44                | 2.0e-10               |
| 0.000                                 |                      |                      |                      |                       |
| 10.554                                | 0.00                 | 0.00                 | 30.37                | 1.3e-7                |
| 10.554                                |                      |                      |                      |                       |
| 10.570                                | 0.00                 | 0.00                 | 30.37                | 2.6e-7                |
| 10.570                                |                      |                      |                      |                       |
| 20.761                                | 0.00                 | 0.00                 | 34.30                | 1.5e-5                |
| 20.761                                |                      |                      |                      |                       |
| 20.762                                | 0.00                 | 0.00                 | 34.30                | 6.0e-6                |
| 20.762                                |                      |                      |                      |                       |
| 21.095                                | 0.00                 | 0.00                 | 34.30                | 5.8e-5                |
| 21.095                                |                      |                      |                      |                       |
| 28.188                                | 0.00                 | 0.00                 | 0.00                 | 4.1e-3                |
| 28.192                                |                      |                      |                      |                       |
| 28.519                                | 0.00                 | 0.00                 | 0.00                 | 6.7e-4                |
| 28.520                                |                      |                      |                      |                       |
| 28.586                                | 0.00                 | 0.00                 | 0.00                 | 7.4e-3                |
| 28.593                                |                      |                      |                      |                       |
| 28.900                                | 0.00                 | 0.00                 | 0.00                 | 7.6e-3                |
| 28.907                                |                      |                      |                      |                       |

| <b>{Cr<sub>2</sub>Er<sub>2</sub>}</b> |                      |                      |                      |                       |
|---------------------------------------|----------------------|----------------------|----------------------|-----------------------|
| <i>E</i> / cm <sup>-1</sup>           | <i>g<sub>x</sub></i> | <i>g<sub>y</sub></i> | <i>g<sub>z</sub></i> | $\Delta_{\text{tun}}$ |
| 0.000                                 | 0.00                 | 0.00                 | 20.80                | 2.4e-5                |
| 0.000                                 |                      |                      |                      |                       |
| 6.732                                 | 0.00                 | 0.00                 | 24.69                | 2.3e-3                |
| 6.734                                 |                      |                      |                      |                       |
| 6.760                                 | 0.00                 | 0.00                 | 24.72                | 5.2e-5                |
| 6.760                                 |                      |                      |                      |                       |
| 13.356                                | 0.00                 | 0.00                 | 26.08                | 1.3e-1                |
| 13.490                                |                      |                      |                      |                       |
| 13.642                                | 0.00                 | 0.00                 | 0.00                 | 6.1e-2                |
| 13.702                                |                      |                      |                      |                       |
| 13.752                                | 0.00                 | 0.00                 | 0.00                 | 6.4e-4                |
| 13.753                                |                      |                      |                      |                       |

| <b>{Cr<sub>2</sub>Tm<sub>2</sub>}</b> |                      |                      |                      |                       |
|---------------------------------------|----------------------|----------------------|----------------------|-----------------------|
| <i>E</i> / cm <sup>-1</sup>           | <i>g<sub>x</sub></i> | <i>g<sub>y</sub></i> | <i>g<sub>z</sub></i> | $\Delta_{\text{tun}}$ |
| 0.000                                 | 0.00                 | 0.00                 | 15.81                | 3.0e-6                |
| 0.000                                 |                      |                      |                      |                       |
| 4.104                                 | 0.00                 | 0.00                 | 19.69                | 6.0e-4                |
| 4.104                                 |                      |                      |                      |                       |
| 4.127                                 | 0.00                 | 0.00                 | 19.69                | 4.6e-4                |
| 4.127                                 |                      |                      |                      |                       |
| 8.220                                 | 0.00                 | 0.00                 | 23.31                | 3.7e-3                |
| 8.224                                 |                      |                      |                      |                       |
| 8.609                                 | 0.00                 | 0.00                 | 0.00                 | 3.3e-4                |
| 8.609                                 |                      |                      |                      |                       |
| 8.610                                 | 0.00                 | 0.00                 | 0.00                 | 4.2e-5                |
| 8.610                                 |                      |                      |                      |                       |
| 11.888                                | 0.00                 | 0.00                 | 0.00                 | 6.4e-2                |
| 11.952                                |                      |                      |                      |                       |

**Table S6.** *Ab-initio* computed main values ( $J_z$  assigned to maximum value) dipolar interaction in complexes **4-7**. Ln-Ln interaction corresponds to  $s=1/2$  sites and Cr-Ln corresponds to  $S=3/2$  and  $s=1/2$  sites.

|          | $J_{\text{dip Ln-Ln}}(x,y,z) / \text{cm}^{-1}$ | $J_{\text{dip Cr-Ln}}(x,y,z) / \text{cm}^{-1}$ |
|----------|------------------------------------------------|------------------------------------------------|
| <b>4</b> | 0, 0, -0.58                                    | 0, 0, -0.06<br>0, -0.01, 0.09                  |
| <b>5</b> | 0, 0.31, -2.10                                 | 0, -0.01, 0.12<br>0, 0.12, -0.14               |
| <b>6</b> | 0, 0, -1.55                                    | 0, 0.7, -0.11<br>0, 0.03, -0.11                |
| <b>7</b> | 0, 0, -1.13                                    | 0, 0.01, -0.11<br>0, 0.01, -0.12               |

**Table S7.** Best fitting parameters of AC magnetic data, according to Debye model for a single relaxation process of complexes **4-7**.

| <b>{Cr<sub>2</sub>Tb<sub>2</sub>}</b>                   |                                       |                                       |          |                   |
|---------------------------------------------------------|---------------------------------------|---------------------------------------|----------|-------------------|
| $T / \text{K}$                                          | $\chi_S / \text{cm}^3\text{mol}^{-1}$ | $\chi_T / \text{cm}^3\text{mol}^{-1}$ | $\alpha$ | $\tau / \text{s}$ |
| 3.50                                                    | 1.79E-01                              | 4.57                                  | 9.21E-02 | 6.93E-02          |
| 3.70                                                    | 1.93E-01                              | 4.26                                  | 6.54E-02 | 3.14E-02          |
| 3.90                                                    | 1.97E-01                              | 4.02                                  | 6.28E-02 | 1.55E-02          |
| 4.10                                                    | 1.88E-01                              | 3.83                                  | 6.73E-02 | 7.88E-03          |
| 4.30                                                    | 1.88E-01                              | 3.65                                  | 6.21E-02 | 4.18E-03          |
| 4.50                                                    | 2.08E-01                              | 3.48                                  | 4.20E-02 | 2.30E-03          |
| 4.70                                                    | 2.07E-01                              | 3.37                                  | 5.01E-02 | 1.37E-03          |
| 4.90                                                    | 1.94E-01                              | 3.24                                  | 5.58E-02 | 8.21E-04          |
| 5.10                                                    | 1.78E-01                              | 3.11                                  | 5.54E-02 | 5.04E-04          |
| 5.30                                                    | 2.26E-01                              | 2.99                                  | 3.53E-02 | 3.31E-04          |
| 5.50                                                    | 2.84E-01                              | 2.89                                  | 1.95E-02 | 2.26E-04          |
| 5.70                                                    | 4.13E-01                              | 2.80                                  | 4.34E-13 | 1.66E-04          |
| 5.90                                                    | 4.97E-01                              | 2.72                                  | 3.72E-19 | 1.22E-04          |
| 6.10                                                    | 5.46E-01                              | 2.64                                  | 2.33E-12 | 8.95E-05          |
| Temperature-dependent AC data under 0 Oe applied field. |                                       |                                       |          |                   |

| <b>{Cr<sub>2</sub>Ho<sub>2</sub>}</b>                   |                                              |                                              |          |            |
|---------------------------------------------------------|----------------------------------------------|----------------------------------------------|----------|------------|
| <i>T</i> / K                                            | $\chi_S$ / cm <sup>3</sup> mol <sup>-1</sup> | $\chi_T$ / cm <sup>3</sup> mol <sup>-1</sup> | $\alpha$ | $\tau$ / s |
| 2.60                                                    | 2.23E-01                                     | 9.48                                         | 9.47E-02 | 1.35E-01   |
| 2.70                                                    | 2.15E-01                                     | 9.02                                         | 9.34E-02 | 7.61E-02   |
| 2.80                                                    | 2.07E-01                                     | 8.64                                         | 9.35E-02 | 4.40E-02   |
| 2.90                                                    | 1.96E-01                                     | 8.31                                         | 9.47E-02 | 2.61E-02   |
| 3.00                                                    | 1.84E-01                                     | 8.01                                         | 9.53E-02 | 1.58E-02   |
| 3.10                                                    | 1.70E-01                                     | 7.73                                         | 9.61E-02 | 9.76E-03   |
| 3.20                                                    | 1.55E-01                                     | 7.49                                         | 9.65E-02 | 6.18E-03   |
| 3.30                                                    | 1.42E-01                                     | 7.26                                         | 9.53E-02 | 3.99E-03   |
| 3.40                                                    | 1.26E-01                                     | 7.05                                         | 9.48E-02 | 2.63E-03   |
| 3.50                                                    | 1.12E-01                                     | 6.85                                         | 9.34E-02 | 1.77E-03   |
| 3.70                                                    | 8.54E-02                                     | 6.49                                         | 8.95E-02 | 8.53E-04   |
| 3.90                                                    | 5.19E-02                                     | 6.19                                         | 8.91E-02 | 4.40E-04   |
| 4.10                                                    | 6.57E-03                                     | 5.92                                         | 9.30E-02 | 2.39E-04   |
| 4.30                                                    | 1.58E-13                                     | 5.67                                         | 1.03E-01 | 1.36E-04   |
| Temperature-dependent AC data under 0 Oe applied field. |                                              |                                              |          |            |

| <b>{Cr<sub>2</sub>Tm<sub>2</sub>}</b>                      |                                              |                                              |          |            |
|------------------------------------------------------------|----------------------------------------------|----------------------------------------------|----------|------------|
| <i>T</i> / K                                               | $\chi_S$ / cm <sup>3</sup> mol <sup>-1</sup> | $\chi_T$ / cm <sup>3</sup> mol <sup>-1</sup> | $\alpha$ | $\tau$ / s |
| 1.90                                                       | 6.62E-01                                     | 4.48                                         | 6.05E-02 | 3.25E-04   |
| 2.00                                                       | 8.47E-01                                     | 4.32                                         | 3.55E-02 | 1.90E-04   |
| 2.10                                                       | 1.13                                         | 4.20                                         | 1.46E-02 | 1.32E-04   |
| 2.20                                                       | 1.52                                         | 4.09                                         | 6.82E-14 | 1.00E-04   |
| Temperature-dependent AC data under 1400 Oe applied field. |                                              |                                              |          |            |

| <b>{Cr<sub>2</sub>Er<sub>2</sub>}</b>                     |                                              |                                              |          |            |
|-----------------------------------------------------------|----------------------------------------------|----------------------------------------------|----------|------------|
| <i>T</i> / K                                              | $\chi_S$ / cm <sup>3</sup> mol <sup>-1</sup> | $\chi_T$ / cm <sup>3</sup> mol <sup>-1</sup> | $\alpha$ | $\tau$ / s |
| 1.90                                                      | 9.04E-01                                     | 6.80                                         | 1.33E-01 | 5.60E-04   |
| 2.00                                                      | 1.11                                         | 6.43                                         | 8.92E-02 | 3.45E-04   |
| 2.10                                                      | 1.33                                         | 6.15                                         | 5.56E-02 | 2.39E-04   |
| 2.20                                                      | 1.63                                         | 5.91                                         | 2.17E-02 | 1.75E-04   |
| 2.30                                                      | 1.93                                         | 5.69                                         | 3.21E-16 | 1.32E-04   |
| 2.40                                                      | 2.23                                         | 5.50                                         | 4.90E-13 | 1.01E-04   |
| Temperature-dependent AC data under 600 Oe applied field. |                                              |                                              |          |            |



| <b>{Cr<sub>2</sub>Tm<sub>2</sub>}</b> |                                       |                                       |          |                   |
|---------------------------------------|---------------------------------------|---------------------------------------|----------|-------------------|
| <i>H</i> / T                          | $\chi_S / \text{cm}^3\text{mol}^{-1}$ | $\chi_T / \text{cm}^3\text{mol}^{-1}$ | $\alpha$ | $\tau / \text{s}$ |
| 600                                   | 1.79                                  | 4.78                                  | 2.22E-18 | 1.13E-04          |
| 800                                   | 1.42                                  | 4.70                                  | 8.51E-19 | 1.37E-04          |
| 1000                                  | 1.18                                  | 4.60                                  | 9.63E-03 | 1.60E-04          |
| 1200                                  | 9.93E-01                              | 4.49                                  | 2.27E-02 | 1.79E-04          |
| 1400                                  | 8.75E-01                              | 4.37                                  | 3.02E-02 | 1.94E-04          |
| 1600                                  | 7.94E-01                              | 4.24                                  | 3.61E-02 | 2.04E-04          |
| 1800                                  | 7.36E-01                              | 4.10                                  | 4.25E-02 | 2.10E-04          |
| 2000                                  | 6.95E-01                              | 3.95                                  | 4.70E-02 | 2.14E-04          |
| 2200                                  | 6.57E-01                              | 3.80                                  | 5.34E-02 | 2.15E-04          |
| 2400                                  | 6.31E-01                              | 3.66                                  | 5.93E-02 | 2.15E-04          |
| 2600                                  | 6.14E-01                              | 3.51                                  | 6.21E-02 | 2.13E-04          |
| 2800                                  | 6.00E-01                              | 3.36                                  | 6.54E-02 | 2.09E-04          |
| 3000                                  | 5.98E-01                              | 3.22                                  | 6.56E-02 | 2.06E-04          |

| <b>{Cr<sub>2</sub>Er<sub>2</sub>}</b> |                                       |                                       |          |                   |
|---------------------------------------|---------------------------------------|---------------------------------------|----------|-------------------|
| <i>H</i> / T                          | $\chi_S / \text{cm}^3\text{mol}^{-1}$ | $\chi_T / \text{cm}^3\text{mol}^{-1}$ | $\alpha$ | $\tau / \text{s}$ |
| 400                                   | 1.97                                  | 6.62                                  | 4.00E-02 | 2.18E-04          |
| 600                                   | 1.15                                  | 6.51                                  | 8.54E-02 | 3.38E-04          |
| 800                                   | 8.66E-01                              | 6.36                                  | 1.03E-01 | 4.67E-04          |
| 1000                                  | 7.47E-01                              | 6.15                                  | 1.09E-01 | 5.95E-04          |
| 1200                                  | 6.66E-01                              | 5.91                                  | 1.10E-01 | 7.04E-04          |
| 1400                                  | 6.08E-01                              | 5.65                                  | 1.09E-01 | 7.89E-04          |
| 1600                                  | 5.61E-01                              | 5.37                                  | 1.11E-01 | 8.46E-04          |
| 1800                                  | 5.32E-01                              | 5.09                                  | 1.12E-01 | 8.84E-04          |
| 2000                                  | 5.09E-01                              | 4.80                                  | 1.13E-01 | 9.03E-04          |
| 2200                                  | 4.92E-01                              | 4.53                                  | 1.15E-01 | 9.09E-04          |
| 2400                                  | 4.78E-01                              | 4.26                                  | 1.17E-01 | 9.05E-04          |
| 2600                                  | 4.71E-01                              | 4.00                                  | 1.16E-01 | 8.94E-04          |
| 2800                                  | 4.63E-01                              | 3.76                                  | 1.18E-01 | 8.78E-04          |
| 3000                                  | 4.55E-01                              | 3.53                                  | 1.20E-01 | 8.56E-04          |

**Table S8.** Broken symmetry and high spin states computed at DFT level for complexes **4-8**.

| <b>4</b> |                  |                  |                  |          |                     |
|----------|------------------|------------------|------------------|----------|---------------------|
|          | spin density     |                  |                  |          | energy<br>/hartrees |
|          | Tb1              | Tb 1'            | Cr1              | Cr1'     |                     |
| HS       | 6.016093         | 6.016050         | 3.104876         | 3.104795 | -29410.63983473     |
| BS1      | 6.018269         | 6.016785         | <b>-3.107343</b> | 3.105501 | -29410.64017623     |
| BS2      | <b>-6.018464</b> | 6.015578         | 3.106202         | 3.105222 | -29410.64017716     |
| BS3      | <b>-6.016293</b> | 6.016314         | <b>-3.106023</b> | 3.105930 | -29410.64021615     |
| BS4      | 6.017778         | <b>-6.017767</b> | <b>-3.106917</b> | 3.106839 | -29410.64012706     |
| <b>5</b> |                  |                  |                  |          |                     |
|          | spin density     |                  |                  |          | energy<br>/hartrees |
|          | Ho1              | Ho1'             | Cr1              | Cr1'     |                     |
| HS       | 4.000534         | 4.002762         | 3.103485         | 3.104505 | -31301.11931970     |
| BS1      | 3.999855         | 4.003771         | <b>-3.107191</b> | 3.105306 | -31301.11947238     |
| BS2      | <b>-3.998744</b> | 4.002054         | 3.104722         | 3.104761 | -31301.11944560     |
| BS3      | <b>-3.999416</b> | 4.003081         | <b>-3.105951</b> | 3.105563 | -31301.11945153     |
| BS4      | 3.997781         | <b>-4.001530</b> | <b>-3.105547</b> | 3.105799 | -31301.11941866     |
| <b>6</b> |                  |                  |                  |          |                     |
|          | spin density     |                  |                  |          | energy<br>/hartrees |
|          | Er1              | Er1'             | Cr1              | Cr1'     |                     |
| HS       | 3.003092         | 3.009057         | 3.104745         | 3.104129 | -32281.79495600     |
| BS1      | 3.000502         | 3.009736         | <b>-3.104085</b> | 3.104945 | -32281.79507967     |
| BS2      | <b>-3.002126</b> | 3.007022         | 3.105073         | 3.103894 | -32281.79504783     |
| BS3      | <b>-3.004728</b> | 3.007701         | <b>-3.103754</b> | 3.104712 | -32281.79510591     |
| BS4      | 3.001281         | <b>-3.004070</b> | <b>-3.105888</b> | 3.104594 | -32281.79511339     |
| <b>7</b> |                  |                  |                  |          |                     |
|          | spin density     |                  |                  |          | energy<br>/hartrees |
|          | Tm1              | Tm1'             | Cr1              | Cr1'     |                     |
| HS       | 1.998946         | 1.992704         | 3.102873         | 3.103334 | -33286.55742161     |
| BS1      | 1.994434         | 1.992736         | <b>-3.103745</b> | 3.104136 | -33286.55757689     |
| BS2      | <b>-1.994709</b> | 1.991474         | 3.102990         | 3.103580 | -33286.55748954     |

|     |                  |                  |                  |          |                 |
|-----|------------------|------------------|------------------|----------|-----------------|
| BS3 | <b>-1.999217</b> | 1.991507         | <b>-3.103626</b> | 3.104389 | -33286.55753619 |
| BS4 | 1.994044         | <b>-1.986478</b> | <b>-3.103789</b> | 3.103223 | -33286.55757947 |

| 8   |                  |                  |                  |          |                     |
|-----|------------------|------------------|------------------|----------|---------------------|
|     | spin density     |                  |                  |          | energy<br>/hartrees |
|     | Yb1              | Yb1'             | Cr1              | Cr1'     |                     |
| HS  | 0.982220         | 0.982205         | 3.102138         | 3.102069 | -34315.90584382     |
| BS1 | 0.974876         | 0.981710         | <b>-3.103013</b> | 3.102846 | -34315.90599609     |
| BS2 | <b>-0.974427</b> | 0.982301         | 3.102431         | 3.101851 | -34315.90600034     |
| BS3 | <b>-0.981821</b> | 0.981807         | <b>-3.102707</b> | 3.102640 | -34315.90596745     |
| BS4 | 0.974950         | <b>-0.974948</b> | <b>-3.103213</b> | 3.103144 | -34315.90602360     |

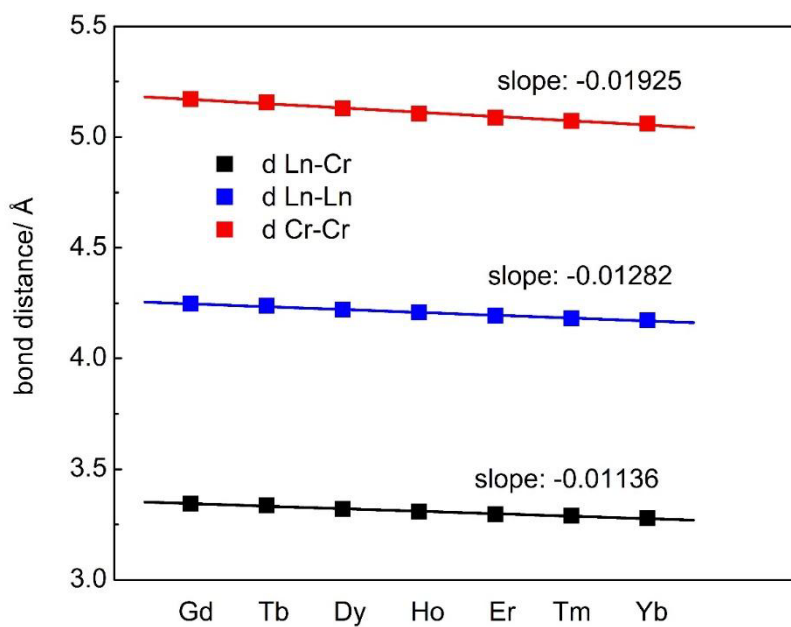

**Figure S1.** Intramolecular meta-metal bond distance trends along lanthanide series of  $\text{Cr}^{\text{III}}\text{Ln}^{\text{III}}_2$  complexes. For slope calculations, the  $x$ -axis is simply in increasing units from 1 to 7.

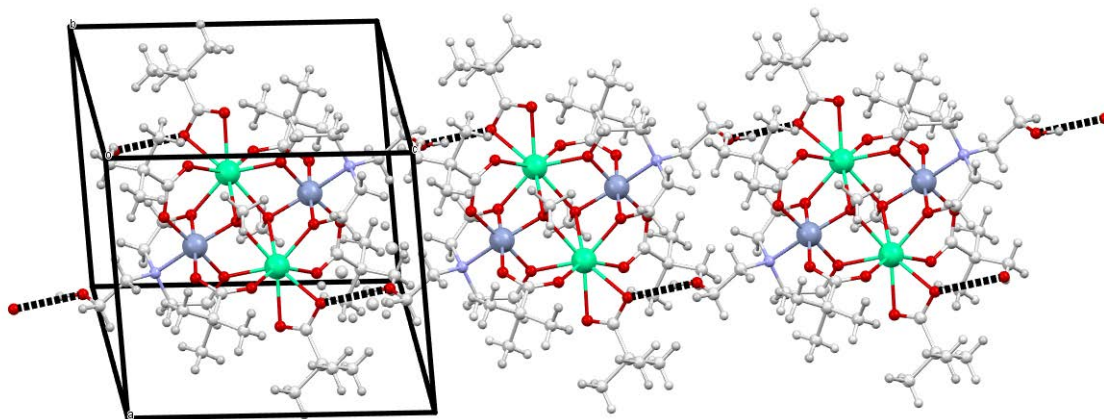

**Figure S2.** Crystalline packing of complex **4**, the H-bond interactions are shown in black.

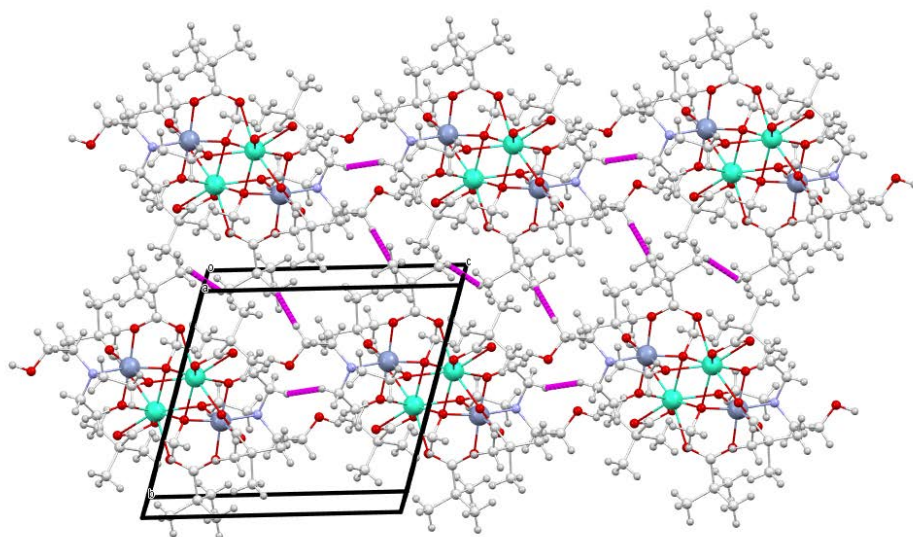

**Figure S3.** Crystalline packing of complex **4**, the C-H...C-H interactions are shown in magenta.

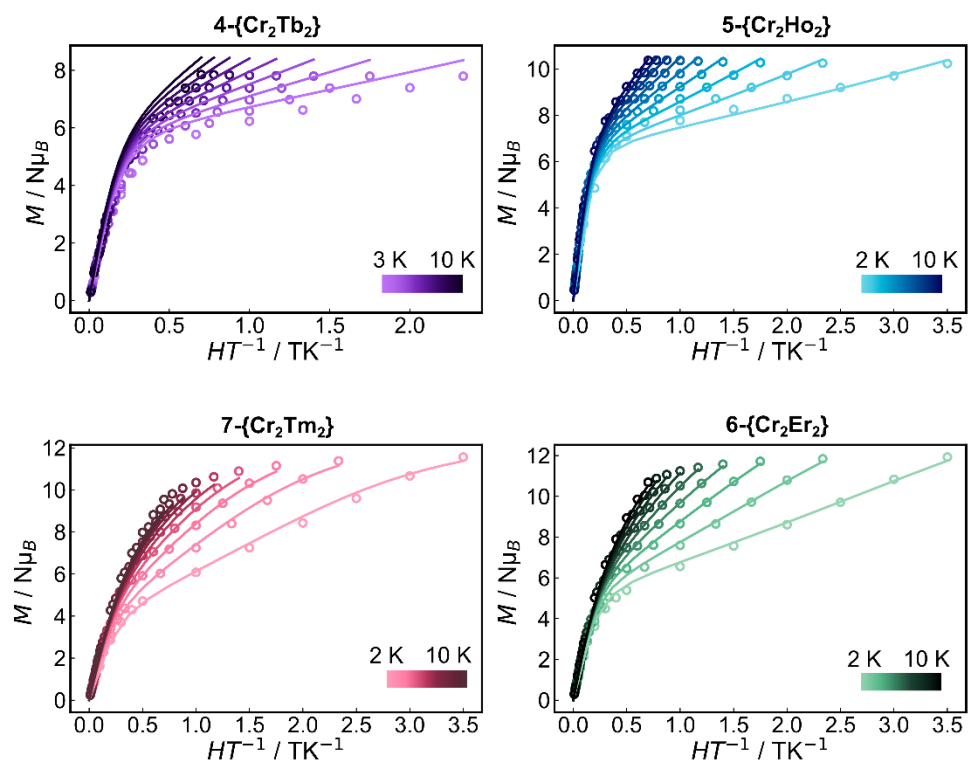

**Figure S4.** Reduced magnetization data of complexes 4-8. Open symbol: experimental; full line: simulated according to model described in the text.

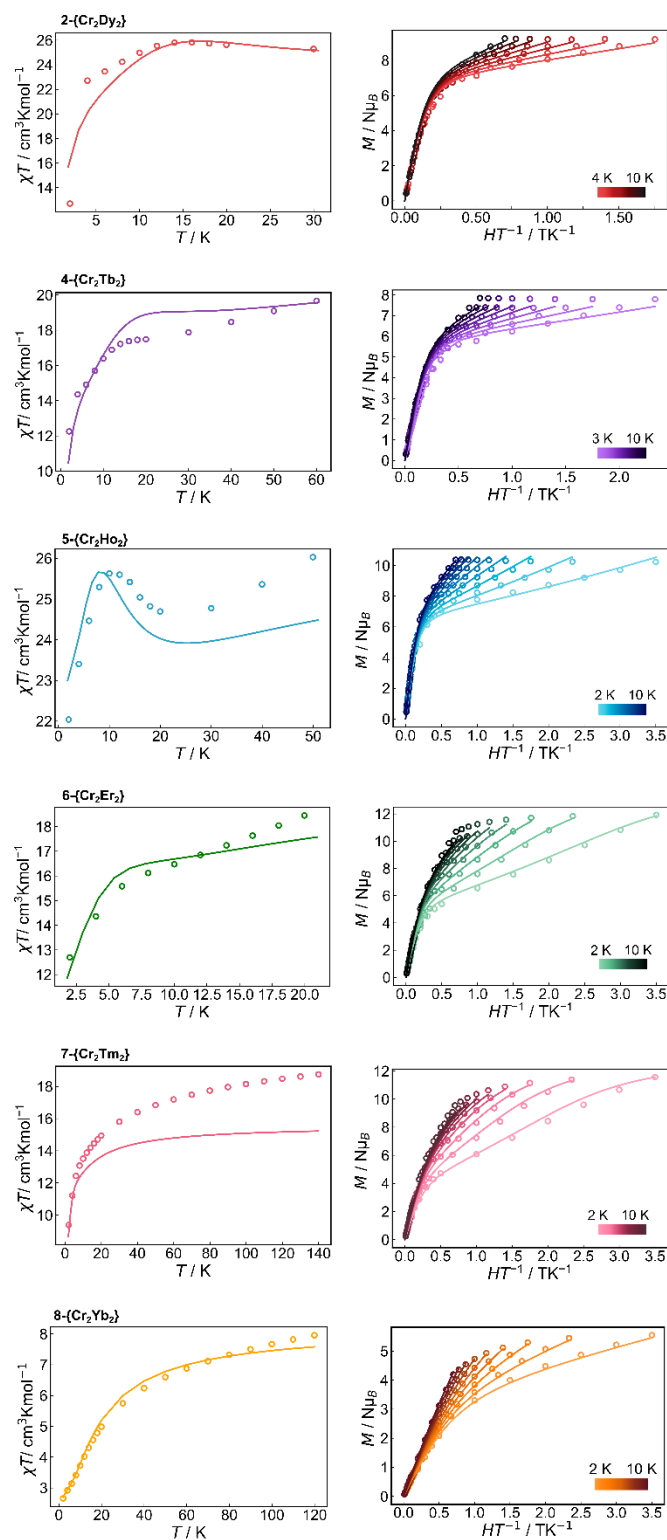

**Figure S5.** Left:  $\chi T$  vs.  $T$  data plot at 0.1 T DC magnetic field of complexes **2** and **4-7**. Right: Reduced magnetization data of complexes **2** and **4-7**. Open symbols: experimental data; full lines: data simulated with the PHI program according to the Hamiltonian specified in the text.

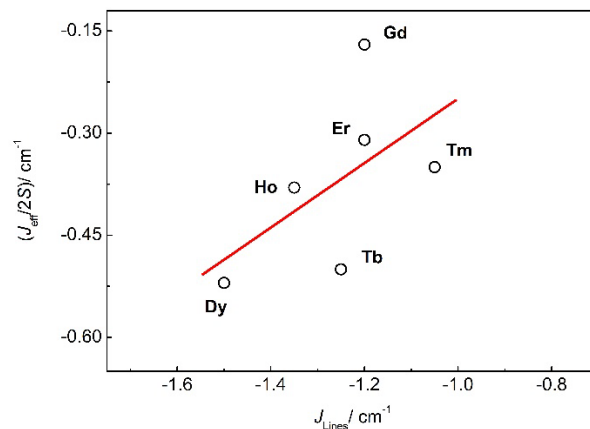

**Figure S6.** Correlation between experimental  $J_{\text{Ln-Cr}}$  isotropic exchange parameter obtained through the Lines approximation and the  $S_{\text{eff}}=1/2$  for Ln(III) ion approximation of  $\text{Cr}^{\text{III}}_2\text{Ln}^{\text{III}}_2$  family (without Yb complex).

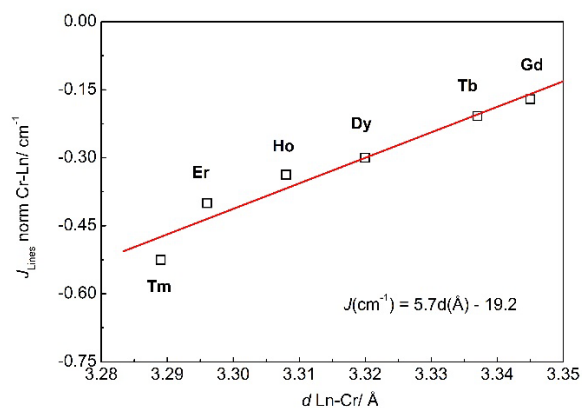

**Figure S7.** Correlation between experimental  $J_{\text{Ln-Cr}}$  isotropic exchange parameter obtained through the Lines approximation and the Ln-Cr bond distance of  $\text{Cr}^{\text{III}}_2\text{Ln}^{\text{III}}_2$  family (without Yb complex).  $J_{\text{Lines norm}} = J_{\text{Lines}}/m$  with  $m$  = number of magnetic orbitals of Ln(III) ions.

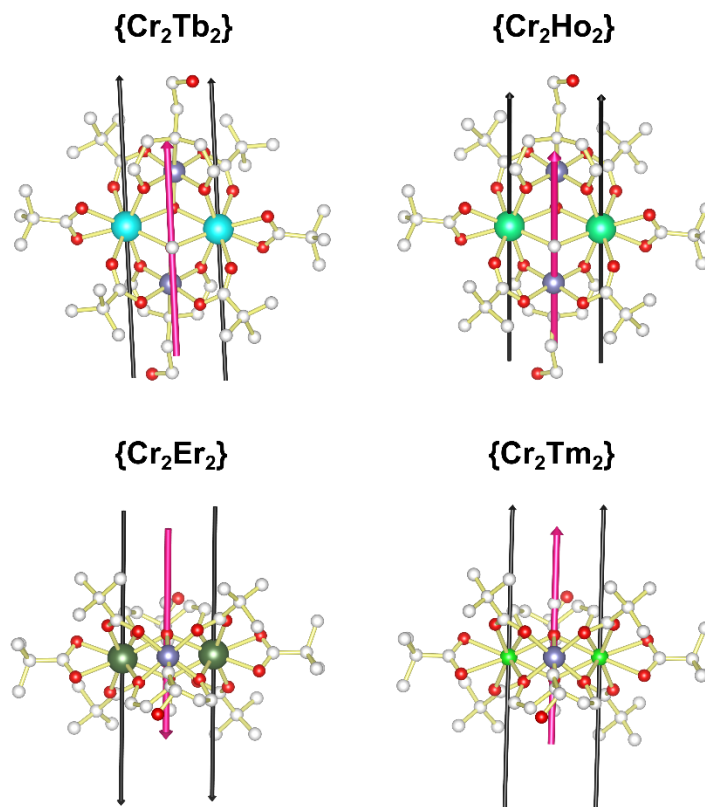

**Figure S8.** Local Ln(III) main axis orientation (black lines) and ground doublet g-tensor orientation of the exchange system (pink arrow, arbitrarily located over O atom of bridging  $-OCH_3$  ligand) in complex 2.



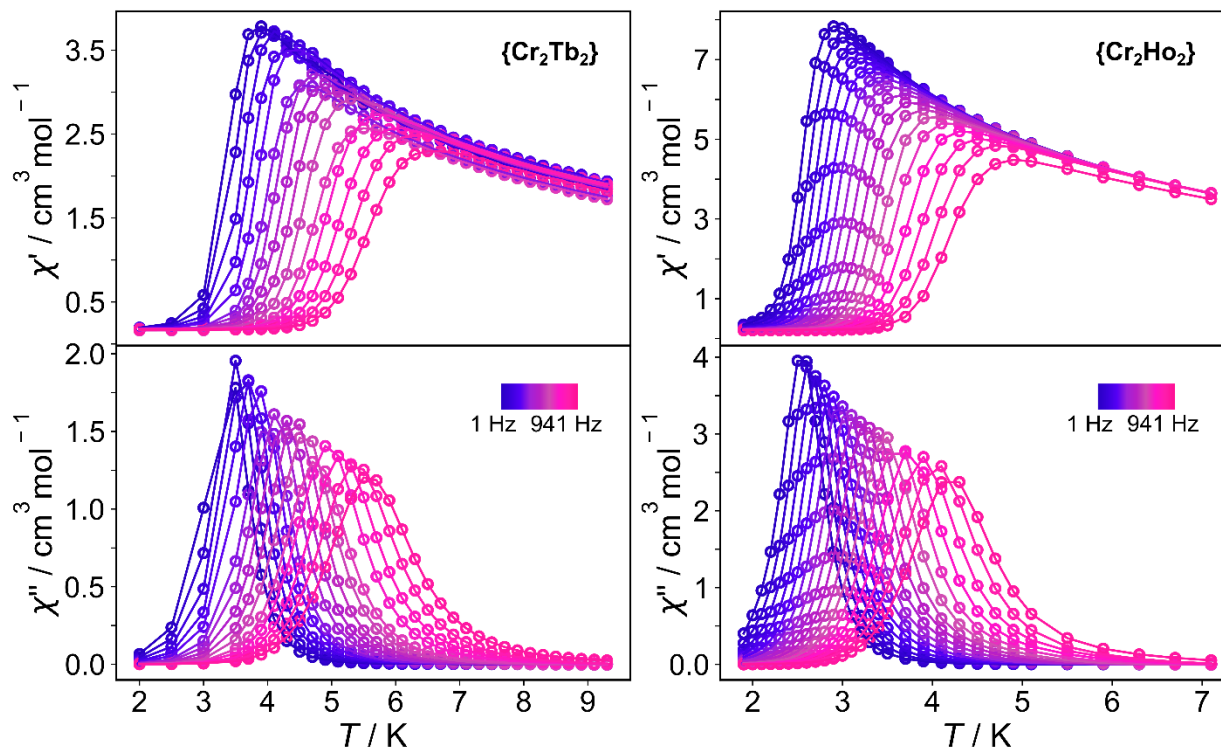

**Figure S9.** AC magnetic susceptibility data of complexes **4-5** at zero applied magnetic field DC at variable temperature and variable frequency (1-941 Hz). Lines are only drawn as eye guideline.

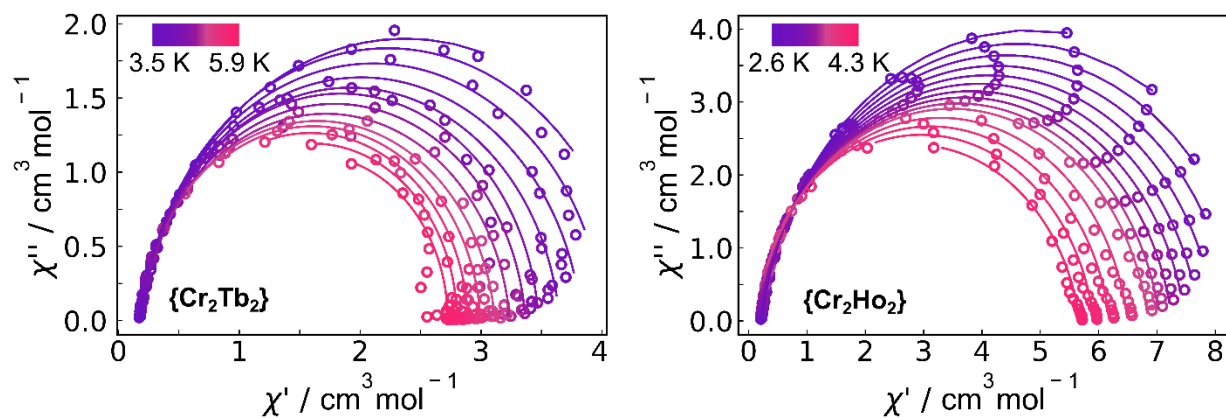

**Figure S10.** Cole-Cole plots of AC magnetic data for complexes **4-5** at 0 Oe. Open symbols: experimental data; full lines: simulated data with generalized Debye model (see text).

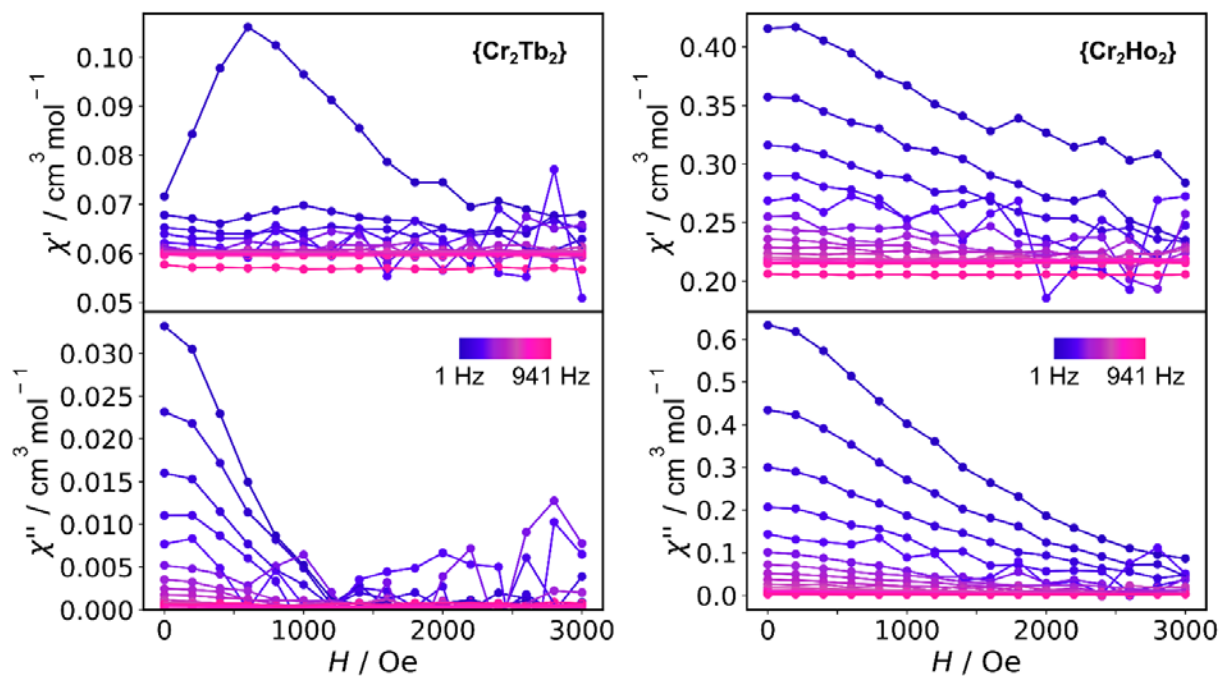

**Figure S11.** AC magnetic susceptibility data of complexes **4-5** at 2 K under DC applied magnetic field (0-3 kOe) and variable frequency (1-941 Hz). Lines are only drawn as eye guidelines.

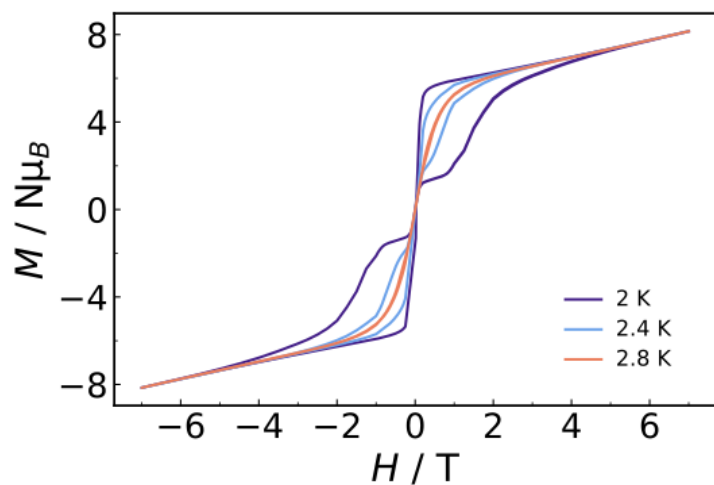

**Figure S12.** Magnetization hysteresis plots of complex **4**. Field scan rate: 0.007 Ts<sup>-1</sup>.

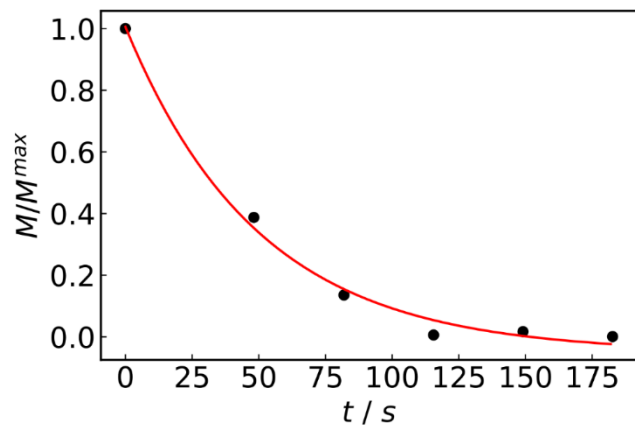

**Figure S13.** Complex 4 magnetization relaxation at 2 K after applying an external DC field of 1000 Oe and switching it off. Open symbol: experimental; full line: fitting with a mono exponential decay (see text).

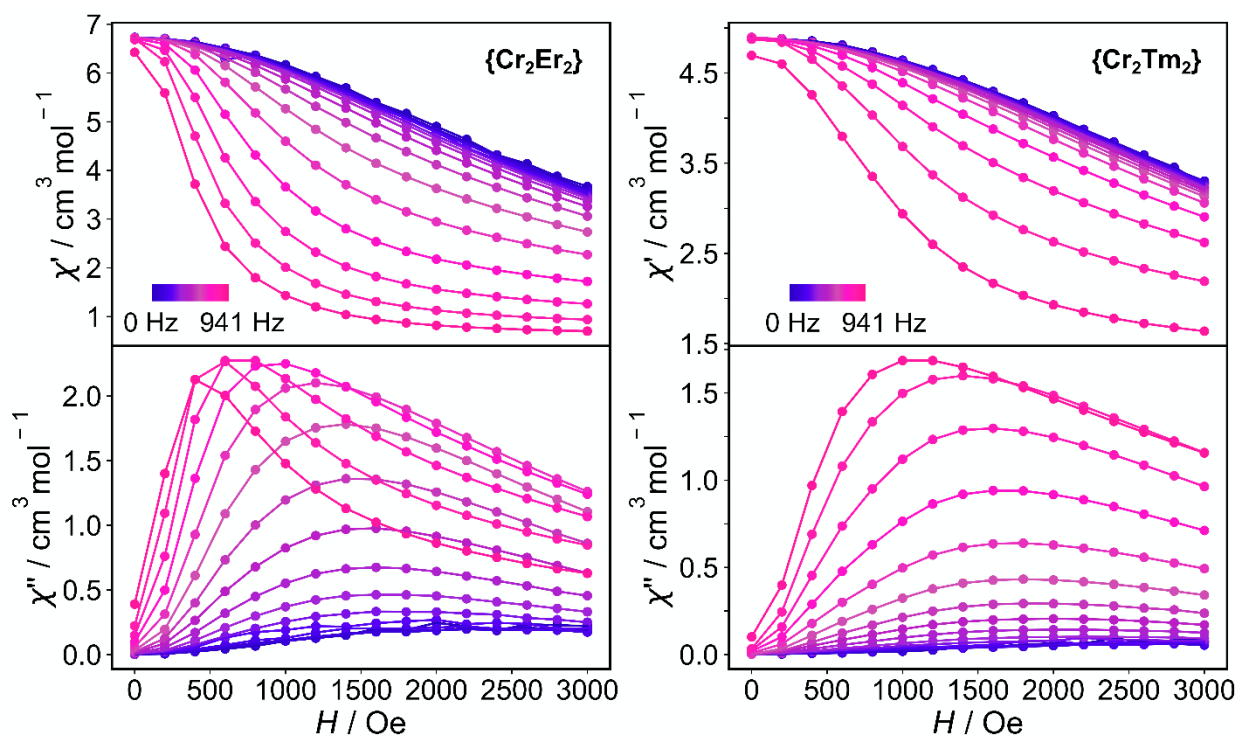

**Figure S14.** AC magnetic susceptibility data of complexes 6-7 at 2 K under DC applied magnetic field (0-3 kOe) and variable frequency (1-941 Hz). Lines are only drawn as eye guidelines.

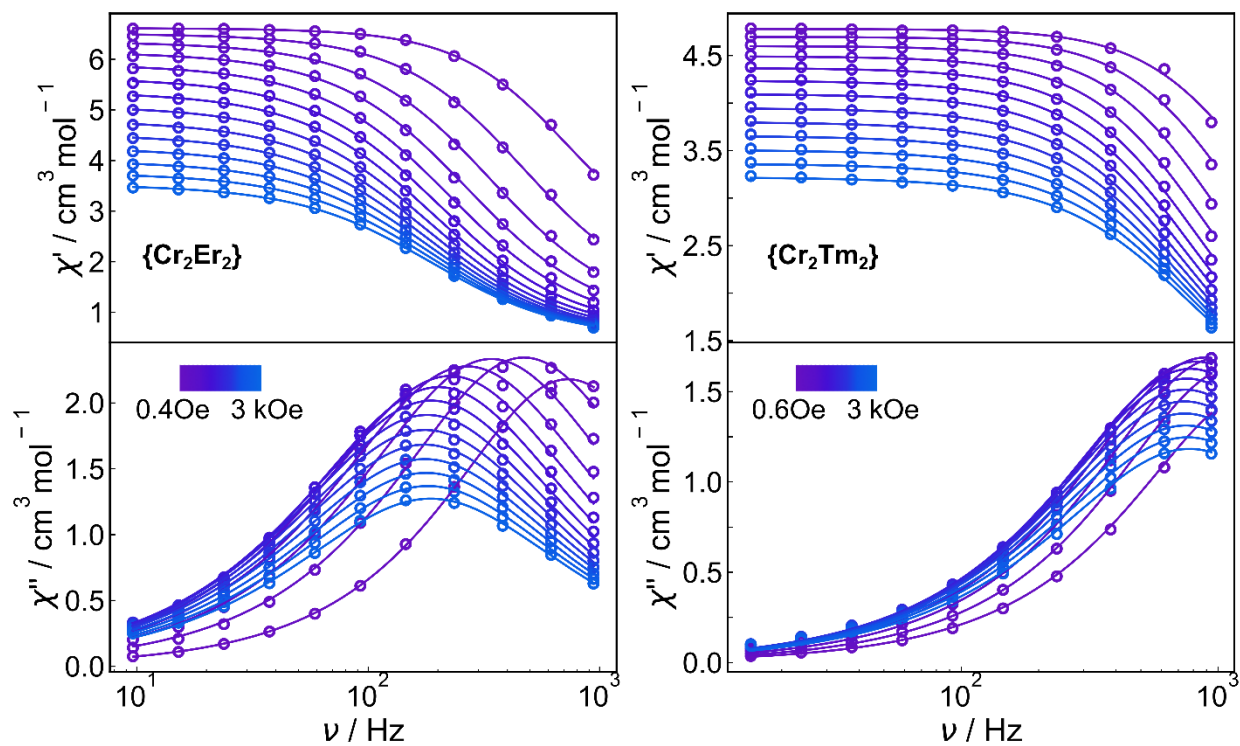

**Figure S15.**  $\chi''$  and  $\chi'$  frequency dependence at variable field under 2 K of complexes **6-7**. Open symbols: experimental data; Full lines: simulated data with a generalized Debye model (see text).

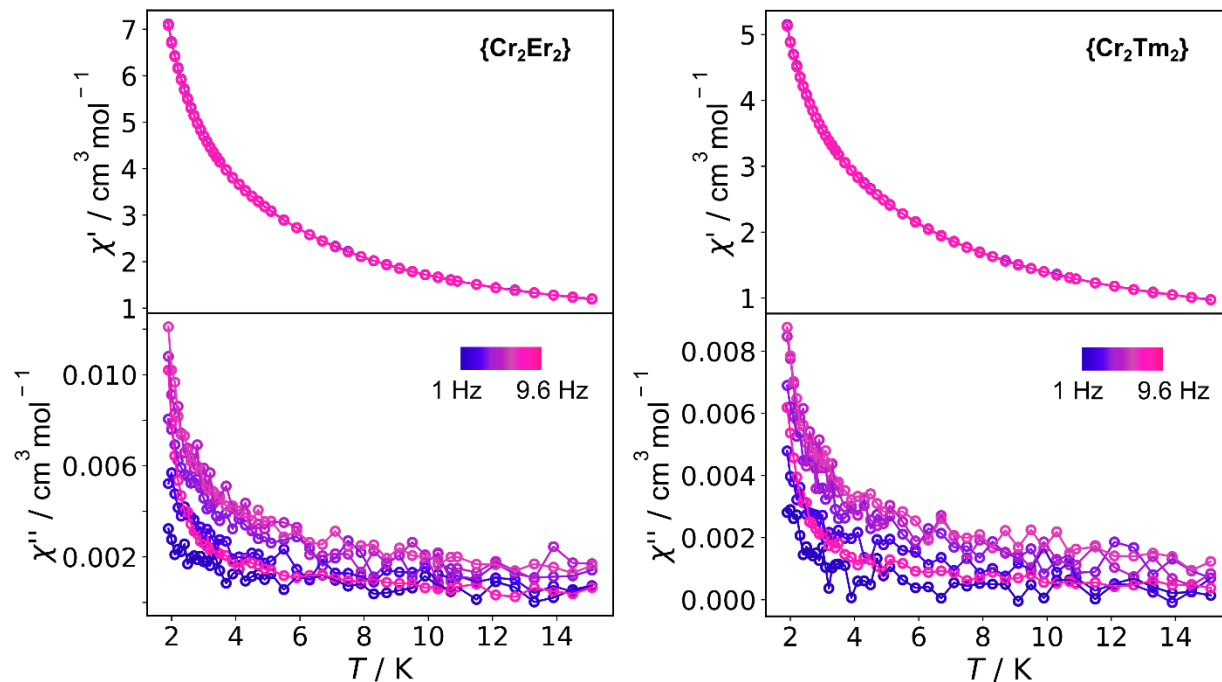

**Figure S16.** AC magnetic susceptibility data of complexes **6-7** at zero applied magnetic field DC at variable temperature and variable frequency (1-9.6 Hz). Lines are only drawn as eye guidelines.

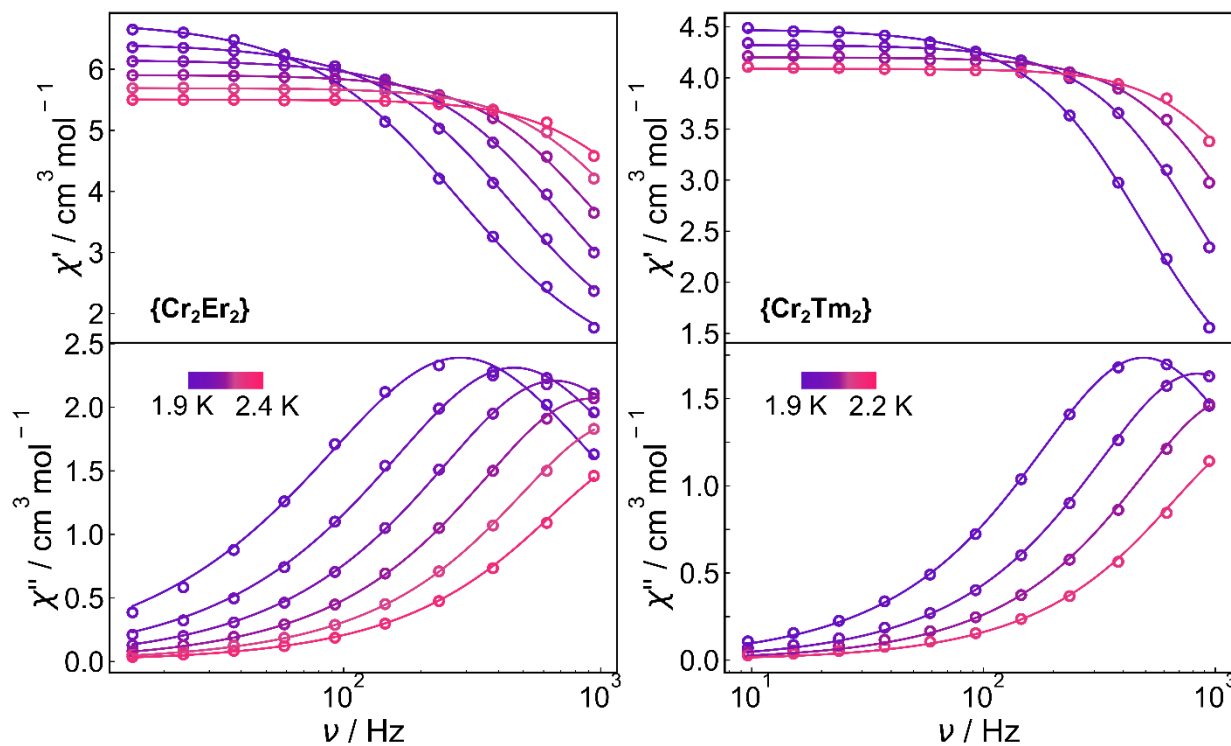

**Figure S17.**  $\chi''$  and  $\chi'$  frequency dependence at variable temperature under applied field of complexes **6-7**. Open symbols: experimental data; Full lines: simulated data with a generalized Debye model (see text).

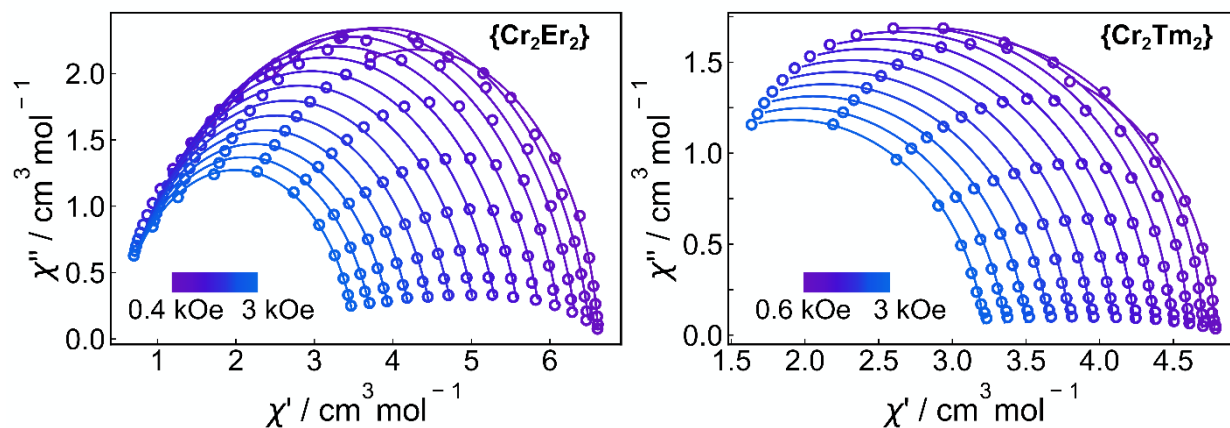

**Figure S18.** Cole-Cole plots of AC magnetic data for complexes **6-7** at 2 K. Open symbols: experimental data; full lines: simulated data with generalized Debye model (see text).

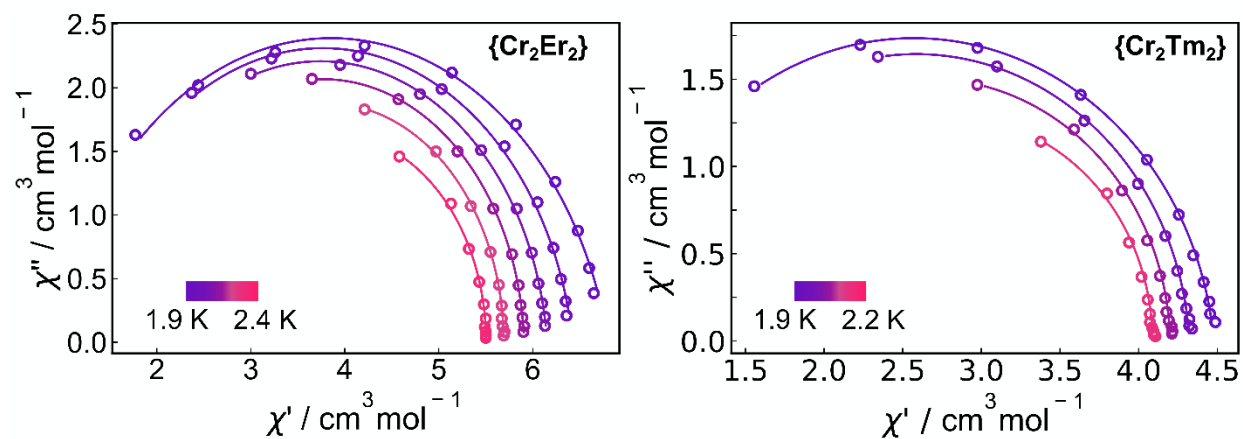

**Figure S19.** Cole-Cole plots of AC magnetic data for complex **6** at 1400 Oe and **7** at 600 Oe. Open symbols: experimental data; full lines: simulated data with generalized Debye model (see text).

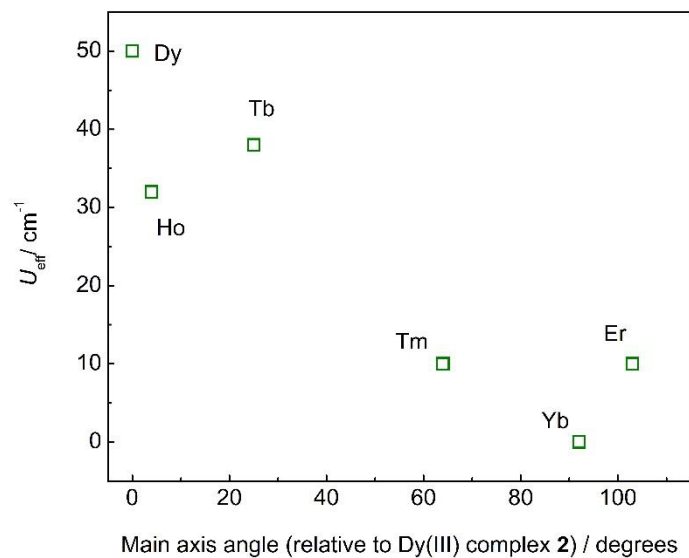

**Figure S20.** Correlation between  $U_{\text{eff}}$  and *ab-initio* calculated main magnetization axis orientation relative to Dy(III) complex **2** along the  $\text{Cr}^{\text{III}}_2\text{Ln}^{\text{III}}_2$  family.  $\text{Cr}^{\text{III}}_2\text{Yb}^{\text{III}}_2$  complex thermal barrier was set arbitrarily to zero as no SMM behaviour was detected in AC magnetic experiments.
